# Supplementary material
Source: PubMed Central journal article supplement (PMC2857713)

**Desmethoxymajusculamide C, a Cyanobacterial Depsipeptide  
with Potent Cytotoxicity in Both Cyclic and Ring-Opened Forms**

T. Luke Simmons,<sup>†</sup> Lisa M. Nogle,<sup>‡</sup> Joseph Media,<sup>§</sup> Frederick A.  
Valeriote,<sup>§</sup> Susan L. Mooberry,<sup>⊥</sup> William H. Gerwick<sup>\*,†,§,⊥</sup>

**Supporting Information**

SI-1. FT-IR and MALDI-TOF-MS of DMMC (**1**)

SI-2. <sup>1</sup>H NMR of DMMC (**1**) at 300 MHz (CDCl<sub>3</sub>)

SI-3. <sup>13</sup>C NMR of DMMC (**1**) at 75 MHz (CDCl<sub>3</sub>)

SI-4. <sup>1</sup>H-<sup>1</sup>H COSY NMR of DMMC (**1**) at 300 MHz (CDCl<sub>3</sub>)

SI-5. <sup>1</sup>H-<sup>13</sup>C HMBC NMR of DMMC (**1**) at 300 MHz (CDCl<sub>3</sub>)

SI-6. <sup>1</sup>H-<sup>13</sup>C meHSQC NMR of DMMC (**1**) at 300 MHz (CDCl<sub>3</sub>)

## DMMC FT-IR and MS

---

- glassy oil with optical rotation  $[\alpha]_D^{22} -104.1^\circ$
- MALDI-TOF-MS: gave  $m/z$  955.5867  $[M+H]^+$
- deduced MF:  $C_{49}H_{78}N_8O_{10}$

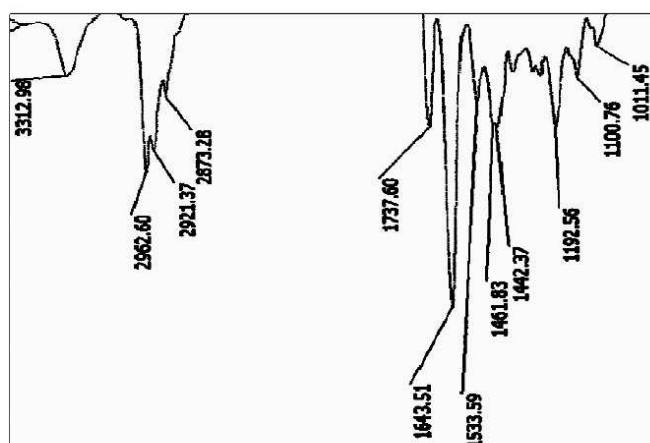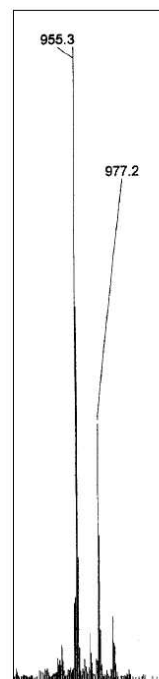

SI-2.  $^1\text{H}$  NMR of DMMC (**1**) at 300 MHz ( $\text{CDCl}_3$ )

DMMC:  $^1\text{H}$  NMR ( $\text{CDCl}_3$ ; 300 MHz)

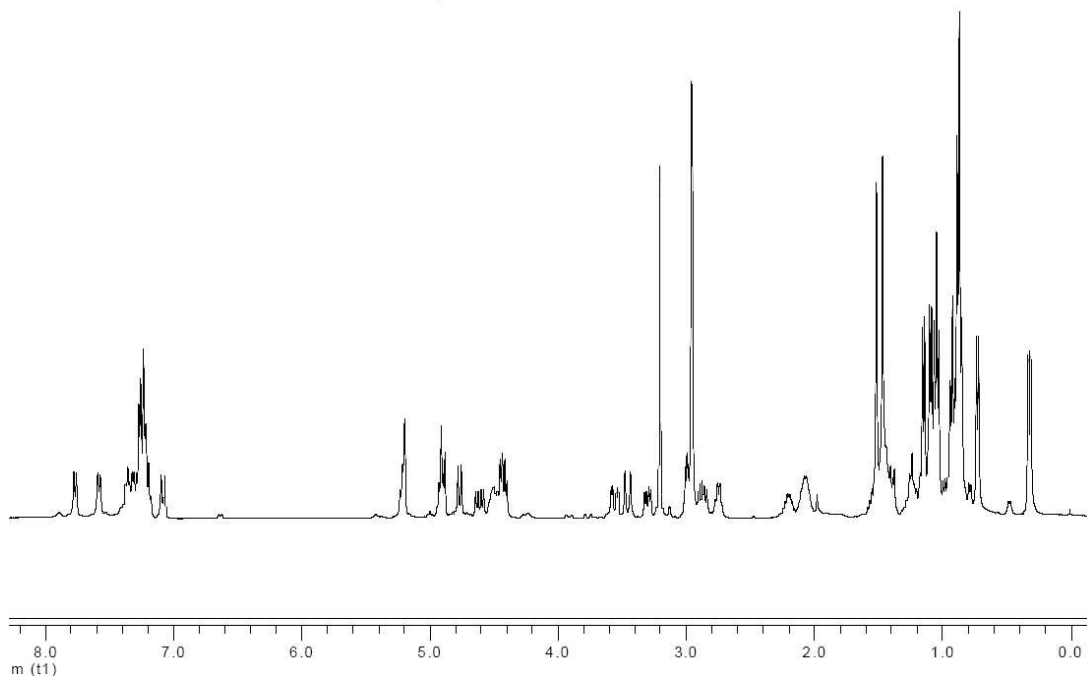

SI-3.  $^{13}\text{C}$  NMR of DMMC (**1**) at 75 MHz ( $\text{CDCl}_3$ )

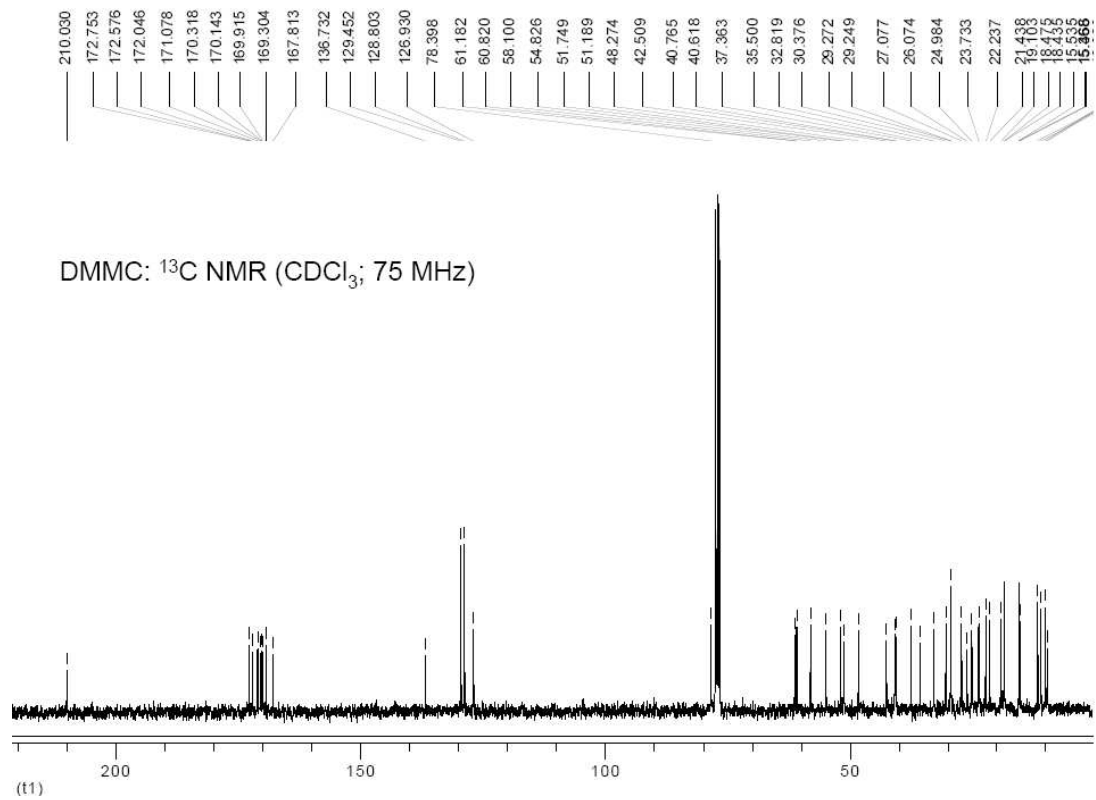

SI-4.  $^1\text{H}$ - $^1\text{H}$  COSY NMR of DMMC (**1**) at 300 MHz ( $\text{CDCl}_3$ )

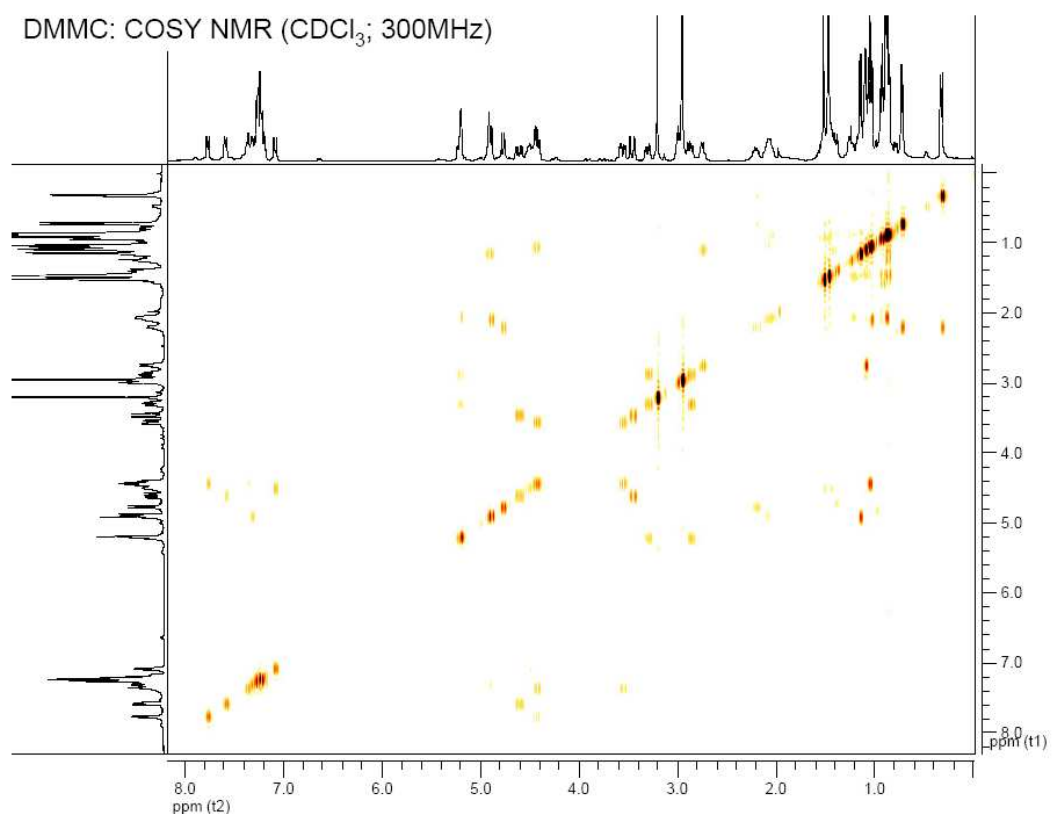

SI-5.  $^1\text{H}$ - $^{13}\text{C}$  HMBC NMR of DMMC (1) at 300 MHz ( $\text{CDCl}_3$ )

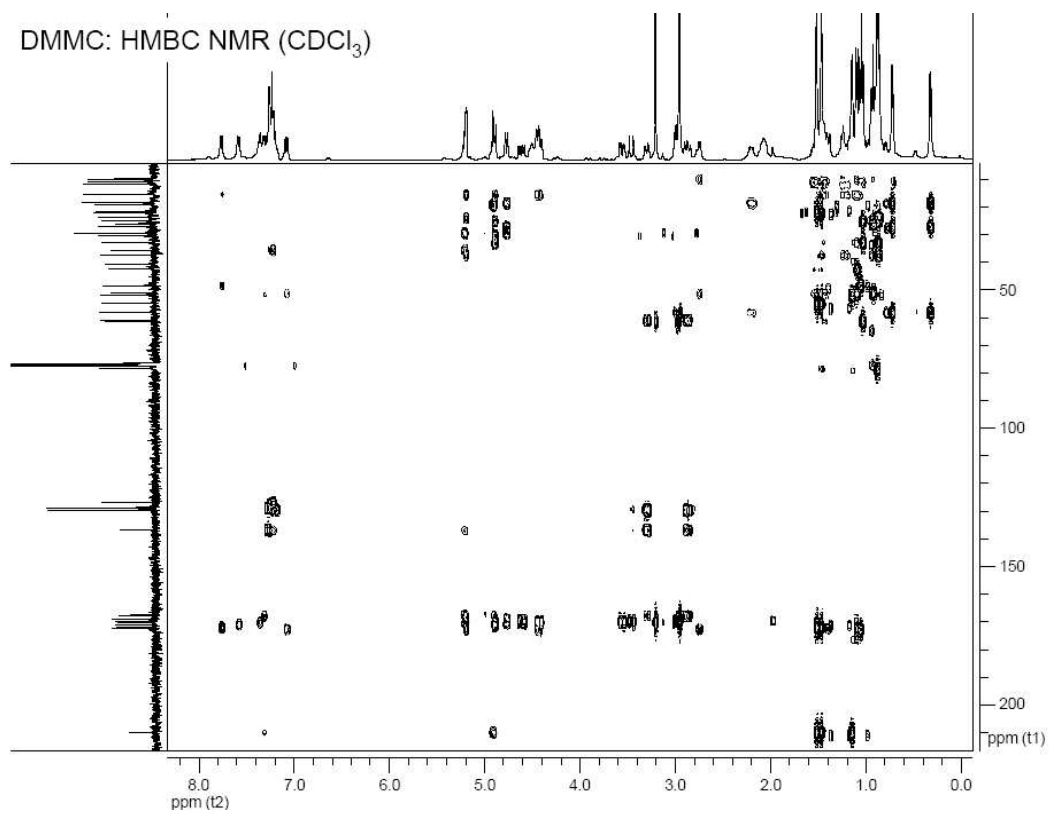

SI-6.  $^1\text{H}$ - $^{13}\text{C}$  meHSQC NMR of DMMC (**1**) at 300 MHz ( $\text{CDCl}_3$ )

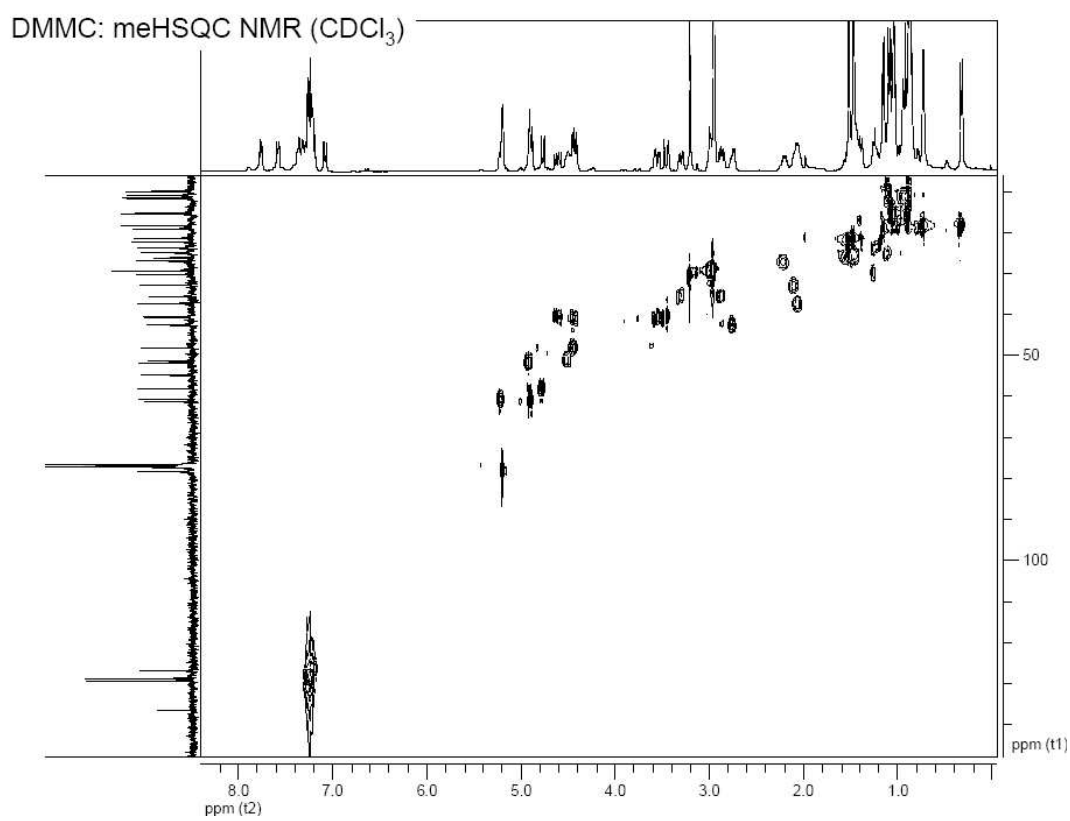

Supplement: NIHMS181456-supplement-1_si_001.pdf [file NIHMS181456-supplement-1_si_001.pdf]
